# Supplementary material
Source: Royal Society of Chemistry journal article supplement (doi:10.1039/d5nj04529k)
Supplement: d5nj04529k1.pdf [file d5nj04529k1.pdf]

## **Supplementary Material**

### **Quercetin-Functionalized Silver Nanoparticles as Selective Colorimetric Sensor of Hg<sup>2+</sup> in Water and Studies on Interactions between the Nanoparticles and Bovine Serum Albumin**

Sushma<sup>a</sup>, Deepti Chauhan<sup>a</sup>, Hendrik C. Swart<sup>b</sup>, and Kalyan Sundar Ghosh<sup>a\*</sup>

*<sup>a</sup>Department of Chemistry, National Institute of Technology Hamirpur, Himachal Pradesh  
177005, India*

*<sup>b</sup>Department of Physics, University of the Free State, Bloemfontein, ZA, 9300, South Africa*

**\*Corresponding Author**

KSG: Tel: +91-1972-254104; Fax: +91-1972-223834; e-mail: [kalyan@nith.ac.in](mailto:kalyan@nith.ac.in)

### *Determination of molar concentration of AgNps*

Assuming spherical shape of the nanoparticles and complete reduction of silver (I) to silver atoms, the molar concentration of AgNps was calculated following the method described by Lewis et al. [24]:

$$C = \frac{N_{NP}}{N_A} \quad (1)$$

Where  $C$  is the molar concentration of AgNPs,  $N_{NP}$  is the number of nanoparticles formed per  $1.5 \times 10^{-3}$  mol of  $\text{AgNO}_3$ ,  $N_A$  is the Avogadro's number. The number of nanoparticles formed per  $1.5 \times 10^{-3}$  mol of  $\text{AgNO}_3$  can be calculated using equation (2)

$$N_{NP} = \frac{N_{atom}}{N} \quad (2)$$

Where  $N_{atom}$  is the number of silver atoms and  $N$  is the number of silver atoms per nanoparticle.

The average number of silver atoms per nanoparticle ( $N$ ) was calculated using (3)

$$N = \frac{\pi \rho D^3}{6 M} \quad (3)$$

Where  $\rho$  is the density of silver ( $10.49 \text{ g/cm}^3$ ),  $M$  stands for atomic weight of silver ( $108 \text{ g/mol}$ ),  $D$  is the average diameter of silver nanoparticles (in nm), which was obtained from TEM.

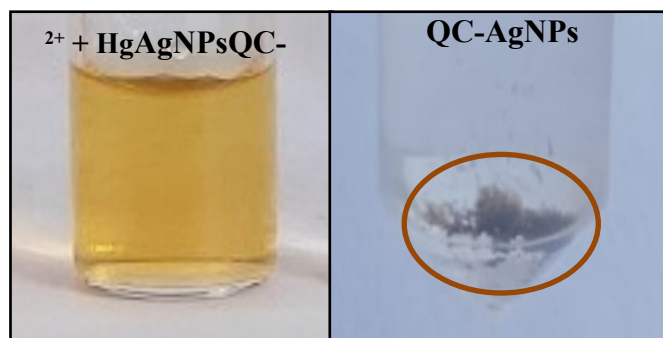

**Fig. S1:** QC-AgNPs before after addition of  $\text{Hg}^{2+}$ .

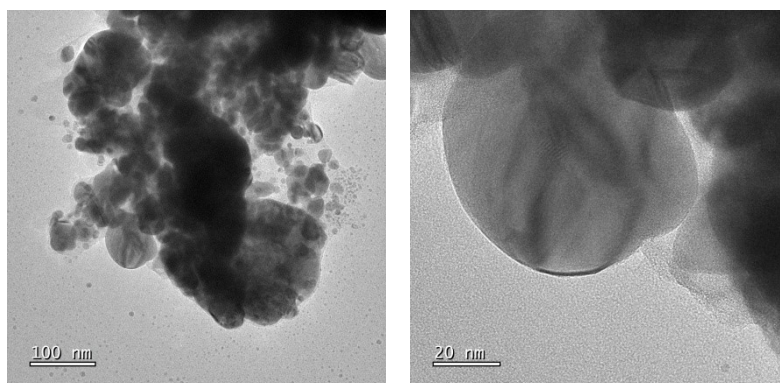

**Fig. S2:** TEM image (at different resolutions) of aggregated QC-AgNPs formed after addition of  $\text{Hg}^{2+}$  to QC-AgNPs.

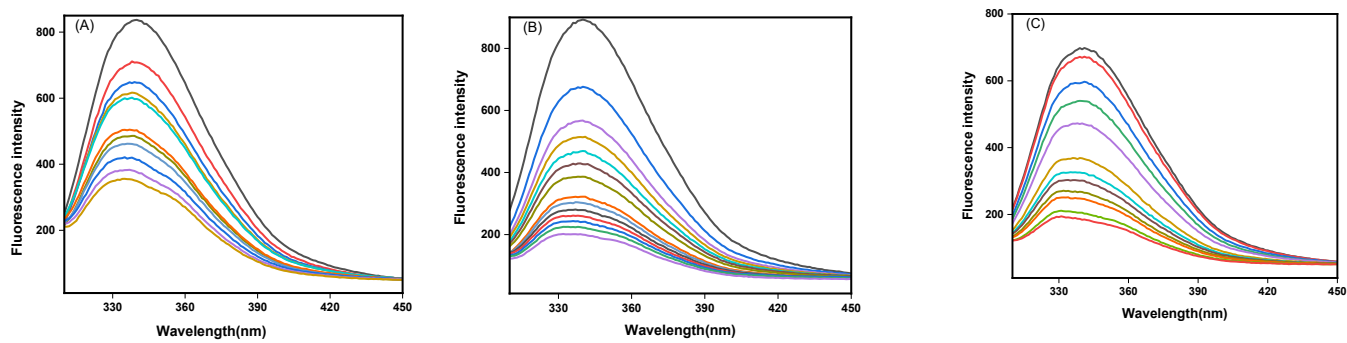

**Fig. S3:** Tryptophan fluorescence spectra of BSA ( $4 \mu\text{M}$ ) in absence and the presence of QC-AgNPs (0.24 to 4.05 nM) at (A) 281K; (B) 297K and (C) 305K,  $\lambda_{\text{ex}}$ : 295 nm.
